# Supplementary material for: Evaluation of Lymphocyte Response to the Induced Oxidative Stress in a Cohort of Ageing Subjects, including Semisupercentenarians and Their Offspring
Source: Hindawi journal article supplement (doi:10.1155/2018/7109312), 2018-01-01
Supplement: f1 [file 7109312.f1.pdf]

| <b>Gene</b>  | <b>Description</b>                                                                                                      |
|--------------|-------------------------------------------------------------------------------------------------------------------------|
| <i>CAT</i>   | Catalase; Converts H <sub>2</sub> O <sub>2</sub> in H <sub>2</sub> O and O <sub>2</sub>                                 |
| <i>GCLC</i>  | Glutamate-Cysteine Ligase Catalytic Subunit; glutathione synthesis                                                      |
| <i>GCLM</i>  | Glutamate-Cysteine Ligase Modifier Subunit; glutathione synthesis                                                       |
| <i>GGCT</i>  | Gamma-Glutamylcyclotransferase; glutathione catabolism                                                                  |
| <i>GGT1</i>  | Gamma-Glutamyltransferase 1; glutathione catabolism                                                                     |
| <i>GGT5</i>  | Gamma-Glutamyltransferase 5; glutathione catabolism                                                                     |
| <i>GGT6</i>  | Gamma-Glutamyltransferase 6; glutathione catabolism                                                                     |
| <i>GGT7</i>  | Gamma-Glutamyltransferase 7; glutathione catabolism                                                                     |
| <i>GPX1</i>  | Glutathione Peroxidase 1; reduction of H <sub>2</sub> O <sub>2</sub> in H <sub>2</sub> O using glutathione (ubiquitary) |
| <i>GPX2</i>  | Glutathione Peroxidase 2; reduction of H <sub>2</sub> O <sub>2</sub> in H <sub>2</sub> O (gastrointestinal)             |
| <i>GPX3</i>  | Glutathione Peroxidase 3; reduction of H <sub>2</sub> O <sub>2</sub> in H <sub>2</sub> O (plasma)                       |
| <i>GPX4</i>  | Glutathione Peroxidase 4; reduction of H <sub>2</sub> O <sub>2</sub> in H <sub>2</sub> O (phospholipid hydroperoxidase) |
| <i>GPX5</i>  | Glutathione Peroxidase 5; reduction of H <sub>2</sub> O <sub>2</sub> in H <sub>2</sub> O (Epydidimis)                   |
| <i>GPX6</i>  | Glutathione Peroxidase 6; reduction of H <sub>2</sub> O <sub>2</sub> in H <sub>2</sub> O (Olfactory)                    |
| <i>GPX7</i>  | Glutathione Peroxidase 7; reduction of H <sub>2</sub> O <sub>2</sub> in H <sub>2</sub> O (Ephitelium gastroesophagean)  |
| <i>GSR</i>   | Glutathione S-reductase; reduces oxidized glutathione                                                                   |
| <i>GSS</i>   | Glutathione Synthetase; glutathione synthesis                                                                           |
| <i>GSTA1</i> | Glutathione S-transferase Alpha 1; add reduced glutathione to electrophilic compounds                                   |
| <i>GSTA2</i> | Glutathione S-transferase Alpha 2                                                                                       |
| <i>GSTA3</i> | Glutathione S-transferase Alpha 3                                                                                       |
| <i>GSTA4</i> | Glutathione S-transferase Alpha 4                                                                                       |
| <i>GSTA5</i> | Glutathione S-transferase Alpha 5                                                                                       |
| <i>GSTK1</i> | Glutathione S-transferase K1; peroxisomal                                                                               |

|               |                                                                                                                      |
|---------------|----------------------------------------------------------------------------------------------------------------------|
| <i>GSTM1</i>  | Glutathione S-transferase Mu 1; add reduced glutathione to electrophilic compounds                                   |
| <i>GSTM2</i>  | Glutathione S-transferase Mu 2                                                                                       |
| <i>GSTM3</i>  | Glutathione S-transferase Mu 3                                                                                       |
| <i>GSTM4</i>  | Glutathione S-transferase Mu 4                                                                                       |
| <i>GSTM5</i>  | Glutathione S-transferase Mu 5                                                                                       |
| <i>GSTO1</i>  | Glutathione S-transferase Omega 1; thiol transferase and dehydroascorbate reductase                                  |
| <i>GSTO2</i>  | Glutathione S-transferase Omega 2                                                                                    |
| <i>GSTP1</i>  | Glutathione S-transferase Pi 1; add reduced glutathione to electrophilic compounds                                   |
| <i>GSTT1</i>  | Glutathione S-transferase Theta 1; haplotype specific                                                                |
| <i>GSTT2B</i> | Glutathione S-transferase Theta 1; pseudogene                                                                        |
| <i>LAP3</i>   | Leucine aminopeptidase 3; glutathione metabolism                                                                     |
| <i>LDHD</i>   | D-Lactate dehydrogenase; methylglyoxal degradation                                                                   |
| <i>MGST1</i>  | Microsomal Glutathione S-transferase 1; production of leukotrienes                                                   |
| <i>MGST2</i>  | Microsomal Glutathione S-transferase 2                                                                               |
| <i>MGST3</i>  | Microsomal Glutathione S-transferase 3                                                                               |
| <i>NOX3</i>   | NADPH Oxidase 3; generation of ROS in inner ear cells                                                                |
| <i>NOX4</i>   | NADPH Oxidase 4; generation of ROS in non phagocytic cells                                                           |
| <i>NOX5</i>   | Calcium dependent-NADPH Oxidase 4; generation of ROS in testis and lymph nodes                                       |
| <i>OPLAH</i>  | 5-Oxoprolinase; Glutathione metabolism                                                                               |
| <i>SOD1</i>   | Superoxide Dismutase 1, Soluble; converts superoxide anion to H <sub>2</sub> O <sub>2</sub> and O <sub>2</sub>       |
| <i>SOD2</i>   | Superoxide Dismutase 2, Mitochondrial; converts superoxide anion to H <sub>2</sub> O <sub>2</sub> and O <sub>2</sub> |
| <i>SOD3</i>   | Superoxide Dismutase 3, Extracellular; converts superoxide anion to H <sub>2</sub> O <sub>2</sub> and O <sub>2</sub> |
| <i>TXN</i>    | Thioredoxin; response to intracellular nitric oxide                                                                  |
| <i>TXN2</i>   | Thioredoxin 2; regulation of membrane potential and oxidant.induced apoptosis                                        |

|               |                         |
|---------------|-------------------------|
| <i>TXNRD1</i> | Thioredoxin reductase 1 |
| <i>TXNRD2</i> | Thioredoxin reductase 2 |

**Suppl. Tab 1.** List of the genes involved in the response to the oxidative stress.

## GGT1

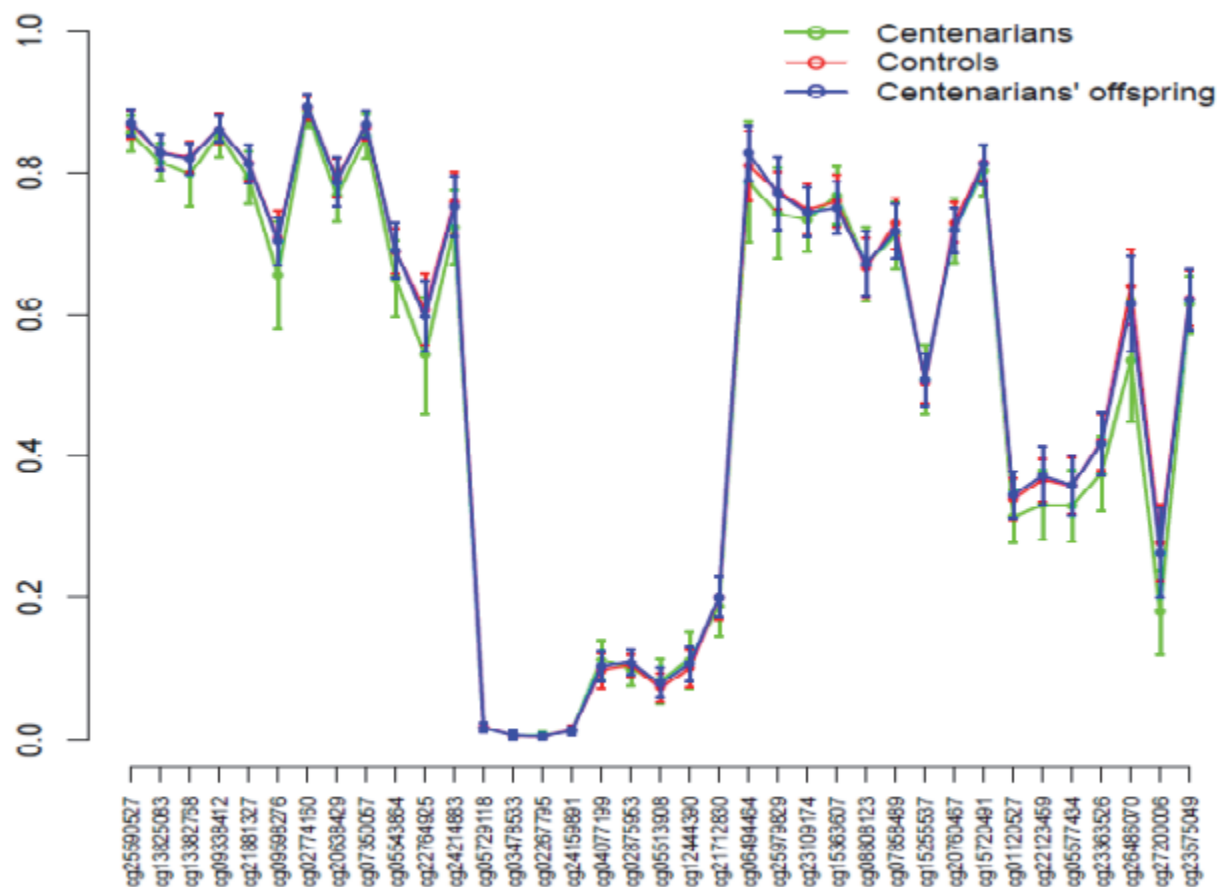

# GSTM2

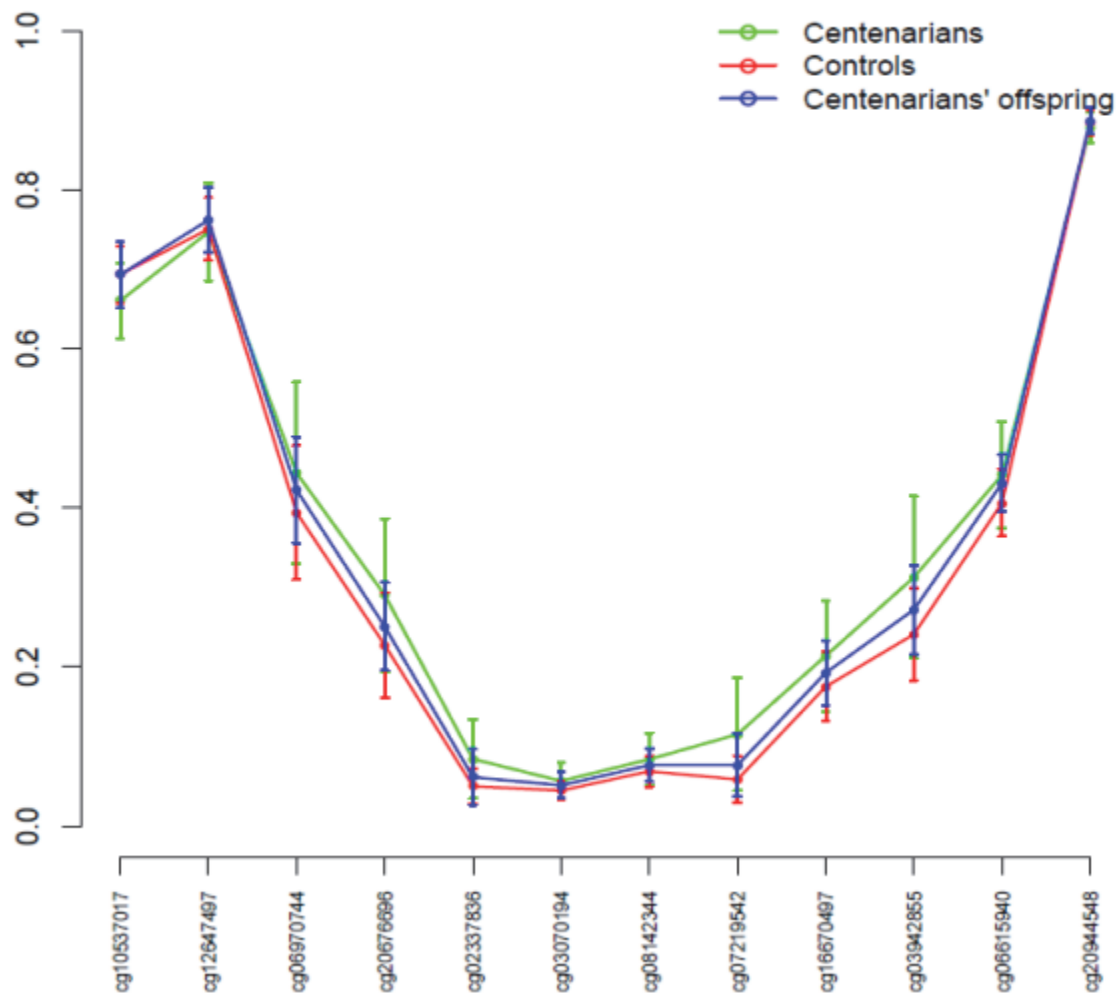

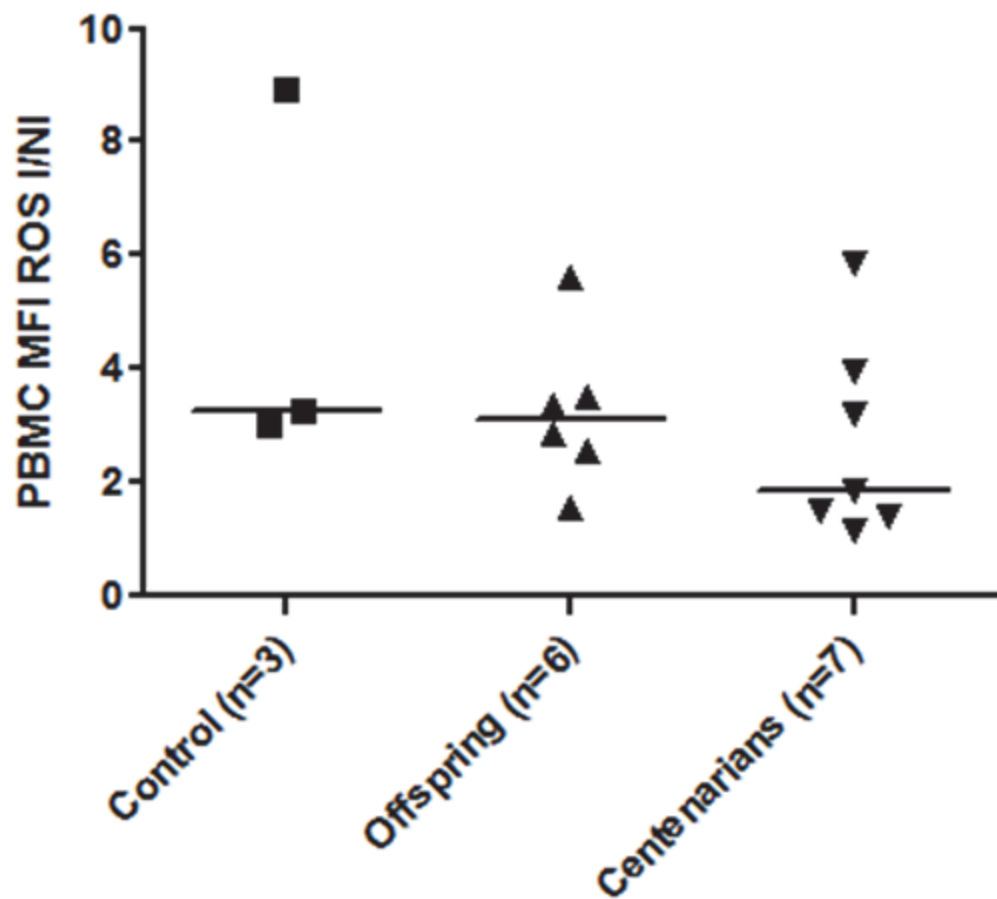

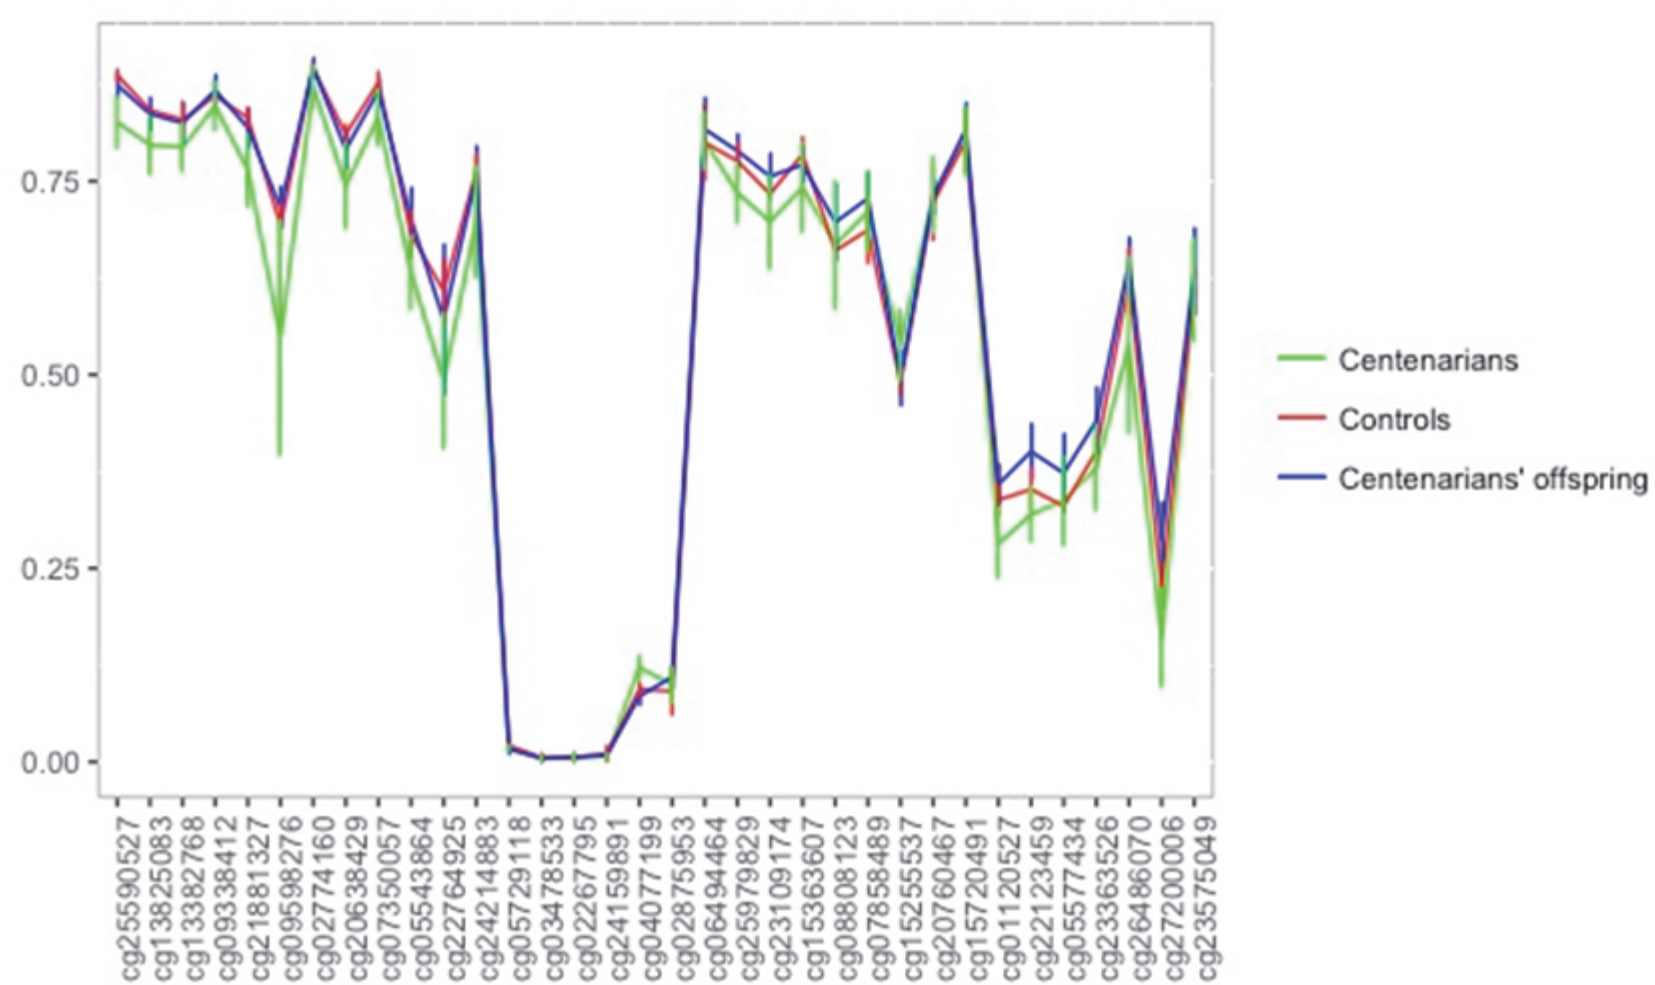

| ROS MFI NI            | YO    | CTRL  | OFF   | CENT  | Overall ANOVA<br>p-value |
|-----------------------|-------|-------|-------|-------|--------------------------|
| <i>CD4 Naive</i>      | 1343  | 734.2 | 1007  | 974.5 | 0.3503                   |
| <i>CD4 Cm</i>         | 1249  | 718.6 | 957.4 | 886.9 | 0.5464                   |
| <i>CD4 Em</i>         | 578.5 | 499.3 | 578.9 | 582.8 | 0.6076                   |
| <i>TReg</i>           | 1548  | 846.2 | 1143  | 1083  | 0.5581                   |
| <i>CD8 Naive</i>      | 899.4 | 453.5 | 681.4 | 666.2 | 0.4657                   |
| <i>CD8 Cm</i>         | 990.5 | 439.5 | 842.0 | 860.6 | 0.4540                   |
| <i>CD8 Em</i>         | 418.9 | 316.6 | 412.3 | 428.9 | 0.4498                   |
| <i>CD8 TemRA</i>      | 539.9 | 360.9 | 425.6 | 385.2 | 0.1695                   |
| <i>B Lymph</i>        | 950.5 | 443.1 | 781.6 | 957.0 | 0.5969                   |
| <i>NK CD56 bright</i> | 455.4 | 154.9 | 280.9 | 309.4 | 0.3714                   |
| <i>NK CD56 dim</i>    | 460.7 | 235.8 | 374.2 | 366.8 | 0.5074                   |

**Tab. S2: MFI values of the ROS probe in the NI condition among the age groups in the PBMC subsets.**



| ROS MFI I             | YO    | CTRL | OFF  | CENT  | Overall ANOVA<br>p-value |
|-----------------------|-------|------|------|-------|--------------------------|
| <i>CD4 Naive</i>      | 1490  | 4044 | 4038 | 3734  | 0.0966                   |
| <i>CD4 Cm</i>         | 1950  | 2547 | 3075 | 3672  | 0.4820                   |
| <i>CD4 Em</i>         | 1401  | 1544 | 1859 | 1449  | 0.5285                   |
| <i>TReg</i>           | 1445  | 1762 | 2095 | 2072  | 0.6754                   |
| <i>CD8 Naive</i>      | 1086  | 1661 | 2385 | 1902  | 0.0677                   |
| <i>CD8 Cm</i>         | 1327  | 1644 | 2220 | 1989  | 0.3397                   |
| <i>CD8 Em</i>         | 1288  | 1246 | 1497 | 1042  | 0.4705                   |
| <i>CD8 TemRA</i>      | 1227  | 1516 | 1670 | 1026  | 0.3013                   |
| <i>B Lymph</i>        | 1214  | 1339 | 1788 | 1327  | 0.4530                   |
| <i>NK CD56 bright</i> | 1214  | 1374 | 1610 | 1080  | 0.8157                   |
| <i>NK CD56 dim</i>    | 939.5 | 1214 | 1285 | 999.2 | 0.5092                   |

**Tab. S3: MFI values of the ROS probe in the I condition among the age groups in the PBMC subsets.**

| TT MFI NI             | YO    | CTRL  | OFF  | CENT  | Overall ANOVA<br>p-value |
|-----------------------|-------|-------|------|-------|--------------------------|
| <i>CD4 Naive</i>      | 11915 | 6474  | 1056 | 1190  | 0.1301                   |
| <i>CD4 Cm</i>         | 13667 | 7139  | 1245 | 1212  | 0.1631                   |
| <i>CD4 Em</i>         | 12402 | 6830  | 1361 | 1207  | 0.2005                   |
| <i>TReg</i>           | 9717  | 5321  | 1140 | 1015  | 0.1497                   |
| <i>CD8 Naive</i>      | 13742 | 7686  | 1644 | 3033  | 0.3759                   |
| <i>CD8 Cm</i>         | 15390 | 9705  | 1617 | 1691  | 0.2287                   |
| <i>CD8 Em</i>         | 15984 | 12797 | 1748 | 1882  | 0.2805                   |
| <i>CD8 TemRA</i>      | 14521 | 13042 | 1923 | 2988  | 0.5022                   |
| <i>B Lymph</i>        | 11440 | 9719  | 1632 | 891.5 | 0.5020                   |
| <i>NK CD56 bright</i> | 15092 | 15365 | 1851 | 1771  | 0.3548                   |
| <i>NK CD56 dim</i>    | 12992 | 28325 | 4693 | 570.3 | 0.0784                   |

**Tab. S4: MFI values of the GSH probe in the NI condition among the age groups in the PBMC subsets.**

| TT MFI I              | YO    | CTRL  | OFF   | CENT  | Overall ANOVA<br>p-value |
|-----------------------|-------|-------|-------|-------|--------------------------|
| <i>CD4 Naive</i>      | 10828 | 12544 | 2770  | 2216  | 0.5349                   |
| <i>CD4 Cm</i>         | 12132 | 13087 | 2851  | 2479  | 0.6001                   |
| <i>CD4 Em</i>         | 13464 | 11890 | 3875  | 3035  | 0.7438                   |
| <i>TReg</i>           | 9217  | 8543  | 1572  | 2755  | 0.8248                   |
| <i>CD8 Naive</i>      | 12119 | 12464 | 3098  | 1587  | 0.8631                   |
| <i>CD8 Cm</i>         | 13579 | 10018 | 3998  | 2252  | 0.7331                   |
| <i>CD8 Em</i>         | 14290 | 12245 | 5651  | 1675  | 0.6108                   |
| <i>CD8 TemRA</i>      | 15394 | 13057 | 4169  | 2789  | 0.5856                   |
| <i>B Lymph</i>        | 12757 | 19274 | 8419  | 5986  | 0.3289                   |
| <i>NK CD56 bright</i> | 18212 | 29518 | 16884 | 19388 | 0.3811                   |
| <i>NK CD56 dim</i>    | 10694 | 30010 | 10029 | 2635  | 0.5513                   |

**Tab. S5: MFI values of the GSH probe in the I condition among the age groups in the PBMC subsets.**

706

|               | CTRL  | OFF   | CENT  | Overall ANOVA<br>p-value |
|---------------|-------|-------|-------|--------------------------|
| PBMC ROS NI   | 380.6 | 732.2 | 597   | 0.1601                   |
| PBMC ROS I    | 1895  | 1931  | 1223  | 0.3449                   |
| PBMC ROS I/NI | 3.278 | 3.107 | 1.841 | 0.4040                   |
| PBMC TT NI    | 10056 | 1502  | 1658  | 0.7061                   |
| PBMC TT I     | 13972 | 3247  | 1917  | 0.7714                   |
| PBMC TT I/NI  | 1.840 | 1.999 | 1.822 | 0.6424                   |

707

708 **Suppl. Tab.6** MFI values of the ROS and GSH probes in the NI, I and I/NI conditions in the whole PBMC population among the age-groups.

709

710
